# Supplementary material for: The plasma membrane H+-ATPase gene family in Solanum tuberosum L. Role of PHA1 in tuberization
Source: PubMed Central journal article supplement (PMC5853856; doi:10.1093/jxb/erx284), 2017-08-19
Supplement: erx284_suppl_supplementary_tables_s1_s2_figures_s1_s9.pdf [file erx284_suppl_supplementary_tables_s1_s2_figures_s1_s9.pdf]

**Table S1.** Primers and reaction conditions used for the determination of PHA isoforms expression by semi-quantitative RT-PCR.

|                       | <b>Primer sequence</b>           | <b>Annealing temperature (°C)</b> | <b>Number of cycles</b> |
|-----------------------|----------------------------------|-----------------------------------|-------------------------|
| PHA1 forward          | 5' GTGAGTGGGTGATAGAATGAAGAC 3'   | 46                                | 20                      |
| PHA1 reverse          | 5' GCCGATAATGAATGCTGTTATAG 3'    | 46                                | 20                      |
| PHA2 forward          | 5' AGAAAAGAAGAGACACACAAGC 3'     | 46                                | 24                      |
| PHA2 reverse          | 5' GACACAATCCCTTTCAATGG 3'       | 46                                | 24                      |
| PHA3 forward          | 5' TGATCAAGTTCCTCATCCG 3'        | 47                                | 26                      |
| PHA3 reverse          | 5' TTAAACGGTGTATGACTGCTG 3'      | 47                                | 26                      |
| PHA4 forward          | 5' GACACAATGATCCAAAACAAGAC 3'    | 48                                | 30                      |
| PHA4 reverse          | 5' ATTCAACAAAATGCCAGCAG 3'       | 48                                | 30                      |
| PHA5 forward          | 5' GTG ATGCCTGGGATTCAATG 3'      | 48                                | 30                      |
| PHA 5 reverse         | 5' CTCCATAATTCATTGCATAATCTTAG 3' | 48                                | 30                      |
| PHA6 forward          | 5' CCTGGTTGTGATAGTCTCC 3'        | 47                                | 35                      |
| PHA6 reverse          | 5' AATCACAATATGCTTTTCAAAAATCC 3' | 47                                | 35                      |
| PHA7 forward          | 5' GATCCCATCAAATTTGCTG 3'        | 46                                | 30                      |
| PHA7 reverse          | 5' GGTGTAATGCGGATTGAC 3'         | 46                                | 30                      |
| EF1- $\alpha$ forward | 5' GTATGGTTGTGACCTTTGG 3'        | 48                                | 20                      |
| EF1- $\alpha$ reverse | 5' CAACATTCTTGACAACAC 3'         | 48                                | 20                      |

**Table S2.** Chromosome localization, coding region length, predicted protein length and molecular weight (MW) of the plasma membrane H<sup>+</sup>-ATPases identified in *S. tuberosum* Phureja (Potato Genome Sequencing Consortium database).

| name        | transcript ID            | peptide ID               | chromosome localization | coding region length (bp) | protein length (aa) | protein MW (KDa) |
|-------------|--------------------------|--------------------------|-------------------------|---------------------------|---------------------|------------------|
| <b>PHA1</b> | PGSC0003DM<br>T400083041 | PGSC0003DM<br>P400055772 | 6                       | 2871                      | 956                 | 105.0            |
| <b>PHA2</b> | PGSC0003DM<br>T400010497 | PGSC0003DM<br>P400007331 | 7                       | 2859                      | 952                 | 105.0            |
| <b>PHA3</b> | PGSC0003DM<br>T400065168 | PGSC0003DM<br>P400043938 | 3                       | 2973                      | 990                 | 109.4            |
| <b>PHA4</b> | PGSC0003DM<br>T400030913 | PGSC0003DM<br>P400021001 | 7                       | 2856                      | 951                 | 104.5            |
| <b>PHA5</b> | PGSC0003DM<br>T400020414 | PGSC0003DM<br>P400013900 | 12                      | 2775                      | 924                 | 101.6            |
| <b>PHA6</b> | PGSC0003DM<br>T400003602 | PGSC0003DM<br>P400002571 | 2                       | 2739                      | 912                 | 101.7            |
| <b>PHA7</b> | PGSC0003DM<br>T400088585 | PGSC0003DM<br>P400060260 | 8                       | 2901                      | 966                 | 106.2            |

PHA6 -----MGLDDLVDLENIPIEQVFENLKCNEGLTYTDVEERLSIYGHNKLEEK 49  
PHA7 MGTEKTTTTLEAINNETVDLENIPIKEVFENLKCTEEGLNSAEVEKRLNVFGHNKLEEK 60  
PHA1 --MGEKPEVLDAVLKETVDLENIPIEEVFENLRCTKEGLTGTAQERLAIFGYNKLEEK 58  
PHA3 --MAEKPEVLDAVLKETVDLENIPIEEVFENLRCTREGLTTAAQERLSIFGYNKLEEK 58  
PHA2 ---MAKAI SLEEKNETVDLEKIPIEEVFQKCSREGLTSDEGANRLQIFGPNKLEEK 57  
PHA4 ---MASNLSLEDIKNEQIDLENI PVEEVFQKCSKEGLSSAEGQKRVEIFGPNKLEEK 57  
PHA5 ---MAANLSLEELKNEKVDLESIPVEEVFQILKCSKEGLTKEEGQKRIEIFGPNKLEEK 57  
.: :\*\*\*.\*:::\*\* :\*..\*\*\*. :\* : :\* \*\*\*\*\*.

PHA6 ESKFLNFLRYSWNPLSRTMVAAMAIVLANGGGRPPDWQLFLGIVTFLIVTNSSYTFVA 109  
PHA7 ESKILKFLGFMWNPLSWVMEAAAIMALFLPHGKHKGVQDFVGI VALLIINS-TISFME 119  
PHA1 ESKFLKFLGFMWNPLSWVMEAAAIMAIALANGGGKPPDWQDFVGIITLLVINS-TISFIE 117  
PHA3 ESKFLKFLGFMWNPLSWVMEAAAIMAIALANGGGKPPDWQDFVGIITLLIINS-TISFIE 117  
PHA2 ESKILKFLGFMWNPLSWVMEAAAIMAIALANGNGKPPDWQDFVGI VCLLINS-TISFIE 116  
PHA4 DNKLLKFLGFMWNPLSWVMECAAIMAIVLANGGGKPPDWDFVGIITVLLIINS-TISFIE 116  
PHA5 ENKVLKFLGFMWNPLSWVMEAAAIMSIVLANGGGKPPDWDFVGI MVLVINS-TISFIE 116  
:.\*. :\* : \*\*\*\*\* . \* .\*\*\*\*\*: \* . \* : \* : \*\*\* :\* : : . : : \*

PHA6 VKLT-SDIAARVQFLHKFCRVLHRGWCEVDSSNLVPGDI IHIKMGDIVPADVRILNFFT 168  
PHA7 ENNAGNAAAALMARLAPKAKVLRDQKWNEDAAVLVPGDI ISIKLGDII PADARLLN--- 176  
PHA1 ENNAGNAAAALMARLAPKAKVLRDQKWNEDAAVLVPGDI ISIKLGDIVPADARLLE--- 174  
PHA3 ENNAGNAAAALMARLAPKAKVLRDQKWNEDAAVLVPGDI ISIKLGDII PADARLLE--- 174  
PHA2 ENNAGNAAAALMAGLAPKTKVLRDGRWSEEAAILVPGDI ISVKLGDIVPADARLLE--- 173  
PHA4 ENSAGNAAASALMANLAPKTKILRDQKWNEDAAVLVPGDI ISIKLGDIVPADARLLE--- 173  
PHA5 ENNAGNAAAALMANLAPKTKVLRDQKWNEDASLLVPGDLISVKLGDII PADARLLE--- 173  
: : . : \* : \* : :\*\*\*.\* \* : : \*\*\*\*\* \* : \* :\*\*\* :\*\*\*.\* \* :

PHA6 TDPVVKIDLSDLTGESLPVTKSRIGDCAYSGSTCQKGEIIAVVIAIGVRTRYRNAAPHV 228  
PHA7 -GDPLKIDQSALTGESLPVTKN-PGDGVYSGSTCQGEIEAVVIATGVHTFFGKA--AHL 232  
PHA1 -GDPLKIDQSALTGESLPVTKG-PGDGVYSGSTCQGEIEAVVIATGVHTFFGKA--AHL 230  
PHA3 -GDPLKIDQSALTGESLPVTKG-PGDGVYSGSTCQGEIEAVVIATGVHTFFGKA--AHL 230  
PHA2 -GDPLKIDQSALTGESLPVTKN-PGDEVFSGSTCQGELEAVVIATGVHTFFGKA--AHL 229  
PHA4 -GDPLKVDQAALTGESLPATKF-PGAEVFSGSTVKQGEIEAVVIATGVHTFFGKA--AHL 229  
PHA5 -GDPLKIDQAALTGESLPVTQK-PGDEVFSGSTVKQGELEAVVIATGVHTFFGKA--AHL 229  
:\* : \* : \*\*\*\*\*.\* \* .:\*\*\*\* :\*\*\* :\*\*\* \*\* \* : \* \* :

PHA6 VKSSNQVECFRR-----VSKGIGNFCIHFA 254  
PHA7 VENTHVGHFQK-----VLTSIGNFCICISIA 258  
PHA1 VDSTNQVGHFQK-----VLTAINFCICISIA 256  
PHA3 VDSTNQVGHFQKASRLFTLLFDAMIWINVDFYELHYKFMGYRQVLTAINFCICISIA 290  
PHA2 VDSTNNVGHFQK-----VLTAINFCICISIA 255  
PHA4 VDSTNNVGHFQK-----VLTAINFCICISIA 255  
PHA5 VDSTNQVGHFQK-----VLTAINFCICISIL 255  
\* . . . . \* \* : : \* . .\*\*\*\*\* :

PHA6 VVMMVEIIVMYCIQHRAYRSGIDNLLVLLIGGIPIAMPTLLLLIMRHGTV--TSSHVIK 312  
PHA7 VGMIIELIVIFGGQHRHPREAVDSLVLVLLIGGIPIAMPTVLSVTMAIGSHRLSQQGAIK 318  
PHA1 VGMIIELIVMYPIQHRKYRPGIDNLLVLLIGGIPIAMPTVLSVTMAIGSHRLAQQGAIK 316  
PHA3 VGMIIELIVMYPIQHRKYRPGIDNLLVLLIGGIPIAMPTVLSVTMAIGSHRLAQQGAIK 350  
PHA2 VGMIIELIVMYPIQHRKYRPGIDNLLVLLIGGIPIAMPTVLSVTMAIGSHRLSQQGAIK 315  
PHA4 VGMVIEIVMYPIQKRYRPGIDNLLVLLIGGIPIAMPTVLSVTMAIGSHRLAQQGAIK 315  
PHA5 VGIIVIEIVVMWPIQKRYRPGIDNLLVLLIGGIPIAMPTVLSVTMAIGSHRLSQQGAIK 315  
. : : \* : \* : \* : \* . : \* .\*\*\*\*\* . \* . \* : \* \* : : . : \*

PHA6 RMTTIDMACMDVLCSDMTGTLTLGMLDVQRDLIEVFANDINKDTVALMAARACNSECA 372  
PHA7 RMTAIEEMAGMDVLCSDKTGTLTLNKLSDVKNLIEVFAKDVEKDMVVLMAARASRLNQD 378  
PHA1 RMTAIEEMAGMDVLCSDKTGTLTLNKLTVDKNLVEVFAKGVADTVVLMAARASRTENQD 376  
PHA3 RMTAIEEMAGMDVLCSDKTGTLTLNKLTVDKALIEVFAKVIDADTVVLMAARASRIENQD 410  
PHA2 RMTAIEEMAGMDVLCSDKTGTLTLNKLSDVKTLEVEVFKGVQDKEYVLLLAARASRVENQD 375  
PHA4 RMTAIEEMAGMDVLCSDKTGTLTLNKLTVDKNLIEVFPKDADKDTVMLLGAARASRIENQD 375  
PHA5 RMTAIEEMAGMDVLCSDKTGTLTLNKLTVDQTLIEVFPKNADADTVMLLAARASRVENQD 375  
\*\*\* : \* : \* \*\*\*\*\* \* \* : : \* : \* : : \* \* : \* . . \* . \* :

PHA6 -----RRAGIS--LRLRCCPTEKQISHTYSDGKGGKHRVSIGKPEHILNH 415  
PHA7 AIDTAIVSMLADPKEARAGITEVHFLPFNPDKRTALTYLDSAGKMHRVSKGAPEQILNL 438  
PHA1 AIDTAIVGMLSDPKEARAGIREIHFLPFNPDKRTALTYLDGEGKMHRVSKGAPEQILNL 436  
PHA3 AIDTAIVGMLADPQEARAGIREIHFLPFNPDKRTALTYLDGEGKMHRVSKGAPEQILNL 470  
PHA2 AIDACMVGMLADPKEARAGIREVHFLPFNPVDRKRTALTYIDNNGNWHRASKGAPEQILD 435  
PHA4 AIDTCIVNMLGDPKEARAGIQEVHFLPFNPVEKRTAITYIDDKGNWHRASKGAPEQIEL 435  
PHA5 AIDACIVNMLGDAKLAREGIQEVHFLPFNPVDRKRTAITYIDGNGDWHRASKGAPEQIEL 435  
\* \* \* : \* . : : \* \* \* \* . \* . \* \* \* . \* : :

|      |                                                                                                                                                                        |     |
|------|------------------------------------------------------------------------------------------------------------------------------------------------------------------------|-----|
| PHA6 | YAHNKS <del>DI</del> EHRVH <del>SV</del> INMFAEKGLKSM <del>AVAYQ</del> EFPS <del>DI</del> EHRVH <del>SAM</del> DI <del>FAEKV</del> LHSIAEQ                             | 475 |
| PHA7 | -AWNKS <del>DI</del> KNRVH <del>SV</del> IDKFAERGLRSLA-----                                                                                                            | 465 |
| PHA1 | -AHNKS <del>DI</del> ERRVH <del>AV</del> IDKFAERGLRSLG-----                                                                                                            | 463 |
| PHA3 | -AHNKS <del>DI</del> ERRVH <del>TV</del> IDKFAERGLRSLG-----                                                                                                            | 497 |
| PHA2 | -CNCKEDVRRK <del>VH</del> SMIDKYAERGLRSLA-----                                                                                                                         | 462 |
| PHA4 | -CELGDIKKKALEI <del>IDDY</del> ANRGLRSLG-----                                                                                                                          | 462 |
| PHA5 | -CGLSGSVLKK <del>SHEI</del> IDNFANRGLRSLG-----                                                                                                                         | 462 |
|      | . . .: .: .: * : * : * : * : * : .                                                                                                                                     |     |
| PHA6 | ANPS <del>DI</del> EQSVH <del>SVID</del> MFAEKV <del>LHSIT</del> LAFQEIP <del>SDIKHT</del> VRSMID <del>V</del> FSEK <del>V</del> LHSIAEAYQ                             | 535 |
| PHA7 | -----VARQ                                                                                                                                                              | 469 |
| PHA1 | -----VAYQ                                                                                                                                                              | 467 |
| PHA3 | -----VAYQ                                                                                                                                                              | 501 |
| PHA2 | -----VARQ                                                                                                                                                              | 466 |
| PHA4 | -----LARQ                                                                                                                                                              | 466 |
| PHA5 | -----VARQ                                                                                                                                                              | 466 |
|      | * *                                                                                                                                                                    |     |
| PHA6 | EVPHGSKEKSGSPWQ <del>LIGLL</del> PFVDP <del>PREDCASSI</del> RELLNH <del>GVNV</del> KMITR <del>DHM</del> VIGKEIGR                                                       | 595 |
| PHA7 | EVPEGTKD <del>SPGGL</del> WEFV <del>GLLPL</del> FDP <del>PRHDS</del> AETIR <del>RALEL</del> GVSV <del>KMIT</del> GDQLAIGKETGR                                          | 529 |
| PHA1 | EVPEGRKES <del>SGPWQ</del> F <del>IGLL</del> PLFDP <del>PRHDS</del> AETIR <del>RALNL</del> GVNV <del>KMIT</del> GDQLAIGKETGR                                           | 527 |
| PHA3 | EVPEGRKES <del>AGGPWQ</del> F <del>IALL</del> PLFDP <del>PRHDS</del> AETIR <del>RALNL</del> GVNV <del>KMIT</del> GDQLAIGKETGR                                          | 561 |
| PHA2 | EVPEKSKES <del>AGGPWQ</del> FV <del>GLLPL</del> FDP <del>PRHDS</del> AETIR <del>RALNL</del> GVNV <del>KMIT</del> GDQLAIAKETGR                                          | 526 |
| PHA4 | TVPEKNKES <del>EGSP</del> WEFV <del>GLLPL</del> FDP <del>PRHDS</del> AETIR <del>KALEL</del> GVAV <del>KMIT</del> GDQLAIGKETAR                                          | 526 |
| PHA5 | TVPEKDKES <del>AGSP</del> WEFV <del>GLLPL</del> FDP <del>PRHDS</del> AETIR <del>KALEL</del> GVNV <del>KMIT</del> GDQLAIGKETGR                                          | 526 |
|      | ** . * : . * . * : : . * * : . * * * . * . * : * * * * * * * : . : . * * * . *                                                                                         |     |
| PHA6 | RLGMGT <del>NMYP</del> SSALLG <del>HNDKS</del> IAAD <del>NLS</del> IDEI <del>IENAD</del> GFV <del>SCAL</del> PEQ <del>YEI</del> IKHLQSRK                               | 655 |
| PHA7 | RLGMGT <del>NMYP</del> SSFLLG <del>EQK</del> DSSA--AVL <del>PIEEL</del> IESAD <del>GFAG</del> -VFPEH <del>KYEI</del> VRILQSRK                                          | 586 |
| PHA1 | RLGMGT <del>NMYP</del> SSALLG <del>QTK</del> DESI--ASL <del>PIDEL</del> IEKAD <del>GFAG</del> -VFPEH <del>KYEI</del> VKRLQARK                                          | 584 |
| PHA3 | RLGMGT <del>NMYP</del> SSALLG <del>QTK</del> DESI--AAL <del>PIDEL</del> IEKAD <del>GFAG</del> -VFPEH <del>KYEI</del> VKRLQARK                                          | 618 |
| PHA2 | RLGMGT <del>NMYP</del> SASLLG <del>QDK</del> DSSI--ASL <del>PVEEL</del> IEKAD <del>GFAG</del> -VFPEH <del>KYEI</del> VKKLQERK                                          | 583 |
| PHA4 | RLGMGT <del>NMYP</del> SSALLG <del>EHK</del> DAAI--AS <del>IPDEL</del> IEKAD <del>GFAG</del> -VFPEH <del>KYEI</del> VKKLQDMK                                           | 583 |
| PHA5 | RLGMGT <del>NMYP</del> SSALLG <del>DHK</del> DESI--AQ <del>IPVEEL</del> IEQAD <del>GFAG</del> -VFPEH <del>KYEI</del> VKKLQERK                                          | 583 |
|      | ***** : * * . . . : : * * * . * * * . . . * * * * * : * * *                                                                                                            |     |
| PHA6 | HVCGMI <del>GGVD</del> DI <del>PALKK</del> KADIRI <del>APY</del> GVTEAAQ <del>NAAD</del> IVL <del>MES</del> GLKYL <del>CEAVL</del> TSRSITV                             | 715 |
| PHA7 | HICGMT <del>GDGVNDA</del> <del>PALKK</del> KADIGI <del>AVADAT</del> DAARGAS <del>DIVL</del> TEP <del>GLSVII</del> HAVLTSRAIFQ                                          | 646 |
| PHA1 | HICGMT <del>GDGVNDA</del> <del>PALKK</del> KADIGI <del>AVDDAT</del> DAARSAS <del>DIVL</del> TEP <del>GLSVII</del> ISAVLTSRAIFQ                                         | 644 |
| PHA3 | HICGMT <del>GDGVNDA</del> <del>PALKK</del> KADIGI <del>AVDDAT</del> DAARSAS <del>DIVL</del> TEP <del>GLSVII</del> ISAVLTSRAIFQ                                         | 678 |
| PHA2 | HIVGMT <del>GDGVNDA</del> <del>PALKK</del> KADIGI <del>AVADAT</del> DAARGAS <del>DIVL</del> TEP <del>GLSVII</del> ISAVLTSRAIFQ                                         | 643 |
| PHA4 | HICGMT <del>GDGVNDA</del> <del>PALKK</del> KADIGI <del>AVDDAT</del> DAARSAS <del>DIVL</del> TEP <del>GLSVI</del> ISAVLTSRAIFQ                                          | 643 |
| PHA5 | HICGMT <del>GDGVNDA</del> <del>PALKK</del> KADIGI <del>AVADAT</del> DAARGAS <del>DIVL</del> TEP <del>GLGVI</del> ISAVLTSRAIFQ                                          | 643 |
|      | * : * * * * * : * * * * * * * * . * : * * : * : * * * * * * * : * * * * * : *                                                                                          |     |
| PHA6 | RMKSCMVH <del>AVSIA</del> IHN <del>V</del> LG <del>FMLL</del> LALV <del>WK</del> FD <del>FP</del> PF <del>KMLII</del> ALANCF <del>INVI</del> ASQNRV <del>KSS</del> SPL | 775 |
| PHA7 | RMKNY <del>TIY</del> AVSITIR <del>IVL</del> G <del>FMLL</del> TA <del>FWK</del> FN <del>F</del> PF <del>MVLVIA</del> ILNDGT <del>IMTI</del> SKDRV <del>KPS</del> SPL   | 706 |
| PHA1 | RMKNY <del>TIY</del> AVSITIR <del>IVL</del> G <del>FMLL</del> LAL <del>IWK</del> FD <del>FP</del> PF <del>MVLI</del> IAILNDGT <del>IMTI</del> SKDRV <del>KPS</del> SPL | 704 |
| PHA3 | RMKNY <del>TIY</del> AVSITIR <del>IVL</del> G <del>FMLL</del> LAL <del>IWK</del> FD <del>FP</del> PF <del>MVLI</del> IAILNDGT <del>IMTI</del> SKDRV <del>KPS</del> SPL | 738 |
| PHA2 | RMKNY <del>TIY</del> AVSITIR <del>IV</del> F <del>GFM</del> LIAL <del>IWK</del> YDF <del>S</del> AF <del>MVLI</del> IAILNDGT <del>IMTI</del> SKDRV <del>KPS</del> PM   | 703 |
| PHA4 | RMKNY <del>TIY</del> AVSITIR <del>V</del> M <del>GFM</del> LIAL <del>IWK</del> DF <del>S</del> PF <del>MVLI</del> IAILNDGT <del>IMTI</del> SKDRV <del>V</del> PSPL     | 703 |
| PHA5 | RMKNY <del>TIY</del> AVSITIR <del>V</del> M <del>GFM</del> LIAL <del>IWE</del> FD <del>FP</del> PF <del>MVLI</del> IAILNDGT <del>IMTI</del> SKDRV <del>KPS</del> SPL   | 703 |
|      | *** . : * * * * * : * : * * * * * : . * : * * * * * : * : * * * * * : * : * * * * * :                                                                                  |     |
| PHA6 | PVNWSLSEI <del>LTTG</del> IVLGSYL <del>AMSTV</del> IFF <del>FWA</del> VYETN <del>FF</del> SLDKT-----                                                                   | 817 |
| PHA7 | PDSWKLSEI <del>FAIG</del> IVLGSYL <del>LAMTAL</del> FF <del>YLT</del> TF <del>ETS</del> FFANAF <del>HV</del> TD <del>FNKHI</del> PENK <del>VIT</del> DSL               | 766 |
| PHA1 | PDSWKLAEI <del>FTTG</del> VV <del>LGGY</del> LAM <del>MTV</del> IFF <del>WAAY</del> ETD <del>FF</del> PR <del>V</del> FGV <del>STL</del> QRTATD-----D                  | 757 |
| PHA3 | PDSWKLAEI <del>FTTG</del> V <del>LGGY</del> LAM <del>MTV</del> IFF <del>WAAY</del> KTN <del>FF</del> PR <del>V</del> FGV <del>STL</del> EKTATD-----D                   | 791 |
| PHA2 | PDSWKLNEI <del>FATG</del> VV <del>LGGY</del> QAL <del>MTV</del> L <del>FF</del> WAM <del>HDT</del> K <del>FF</del> SD <del>K</del> FGV <del>KD</del> IRES-----         | 752 |
| PHA4 | PDSWKLNEI <del>FATG</del> VV <del>LGT</del> YQAI <del>MTV</del> V <del>FF</del> YLAAD <del>T</del> DF <del>FT</del> EN <del>F</del> H <del>VRS</del> IRNS-----         | 752 |
| PHA5 | PDSWKLNEI <del>FATGI</del> L <del>LGT</del> YQAL <del>MTV</del> L <del>FF</del> YLAAS <del>T</del> DF <del>FT</del> E <del>K</del> FG <del>VRS</del> IREN-----         | 752 |
|      | * . * . * * * : * : * * * * * : * : * * * * * : . * . * * * * * :                                                                                                      |     |

```

PHA6      YMKFVLAVLLQVSSSNYALIFVTRTRGKLL---PGCDSLLFIWVSYQLL-----FTML      866
PHA7      NAKLASAVYLQVSTISQALIFVTRSRGWSFMERPGLL-LVVAFIVAQLVATFMSAMVTSV      825
PHA1      FRKLASAIYLVQVSTISQALIFVTRSRWSFVERPGLL-LVVAFLIAQLVATLIA-VYASW      815
PHA3      FRKLASAIYLVQVSTISQALIFVTRSRWSFVERPGLL-LVFAFFVAQLVATLIA-VYANW      849
PHA2      DEEMMSALYLVQVSIISQALIFVTRSRWSFVERPGAL-LMIAFLIAQLVATLIA-VYADW      810
PHA4      PNELTAALYLVQVSIISQALIFVTRSRWSFVERPGLM-LVGAFFAAQLVATVLA-VYADW      810
PHA5      EHGLTAAVYLVQVSIISQALIFVTRSRWSFVERPGFL-LVVAFFLAQFVATLIT-VYANW      810
          :  * : **** . *****:      **  * :  .  *::      :

PHA6      AVSGDQSICWSCAGKIWLYNIVFYVPLYCIKFFNQSRKGFLKSIL*-----          912
PHA7      KFAGIEKIGWRWTGVIWLFNIITYFLLDPIKFAVRYALSGRAWGLLNQKTAFTNRKDFG      885
PHA1      SFAAIEGIGWGAGVIWLYNLVVFYFPLDIIKFLIRYALSGRAWDLVLEQRIAFTRKKDFG      875
PHA3      SFAAIEGIGWGAGVIWLYNLVTYIPLDLIKFLIRYALSGKAWDLVLEQRIAFTRKKDFG      909
PHA2      TFARVKGCGWGAGVIWIFSVTYFPLDIMKFAIRYILSGKAWNNLLDNKTAFTTKKDYG      870
PHA4      EFARIKGVGWGAAVWVYTIITYLPQDVLKFIIRFGLSGRAWDTMIQNKTAFTTKKDYG      870
PHA5      NFARIHGIGWAAIIWVYTIITYLPLDVLKFISRYALSGDAWDSMIQNKTAFTTKKDYG      870
          .: .  *  .: .**::: * .  :** :  . *  :

PHA6      -----          912
PHA7      KEAREAAWAAEQRTIHGLQSVET-KTFPENYTFREISVMAEEAKRRADIARLRELHTLKG      944
PHA1      KEQRELQWAHAQRTLHGLQVPDT-KLFSSETNFNELNQLAEEAKRRAEIARQRELHTLKG      934
PHA3      KELRELQWAHAQRTLHGLQVPDP-KIFSETNFNELNQLAEEAKRRAEIARLRELHTLKG      968
PHA2      KEEREQWALAQRTLHGLQPPEASNLFNEKNSYRELSEIAEQAKRRAEMARLRELHTLKG      930
PHA4      RGEREAQWALAQRTLHGLQTPEAAGLFNDK-NYRELSEIAEQAKRRAEVARLRELHTLKG      929
PHA5      KGEREAQWAVDQRTRHGLQTAESNGLFHDK-NYRELNEIAEQAKRRAEVAKYTHE*-----  924

PHA6      -----          912
PHA7      KVESFAKLRGLDVDHVNPHYTV*          966
PHA1      HVESVVKLKGLDIETIQQSYTV*          956
PHA3      HVESVVKLKGLDIETIQQSYTV*          990
PHA2      HVESVVKLKGLDIETIQQHYTV*          952
PHA4      HVESVVKLKGLDIETIQQHYTV*          951
PHA5      -----          924

```

**Fig. S1.** Alignment of the protein sequences of the plasma membrane H<sup>+</sup>-ATPases identified in *S. tuberosum* Phureja (PHA1: PGSC0003DMP40005772 PHA2: PGSC0003DMP40007331, PHA3: PGSC0003DMP400043938 PHA4: PGSC0003DMP400021001, PHA5: PGSC0003DMP400013900, PHA6: PGSC0003DMP400002571, PHA7: PGSC0003DMP400060260). Sequences were aligned with the Clustal Omega program (<http://www.ebi.ac.uk/Tools/msa/clustalo/>). Identities are indicated by asterisks below the sequence. Conserved substitutions are marked with two vertical dots and semi-conserved substitutions are marked with a single dot. Unaligned residues are shown as dashes within the sequence line. The putative transmembrane domains (identified using the Phobius program, EMBL, version 1.1, <http://www.ebi.ac.uk/Tools/pfa/phobius/>) are shaded in gray. The 14-3-3 binding site is marked in blue. The conserved sequences common to P-ATPases (TGES, DKTGTLT, GDGVNDA and KGAP) are indicate in red.

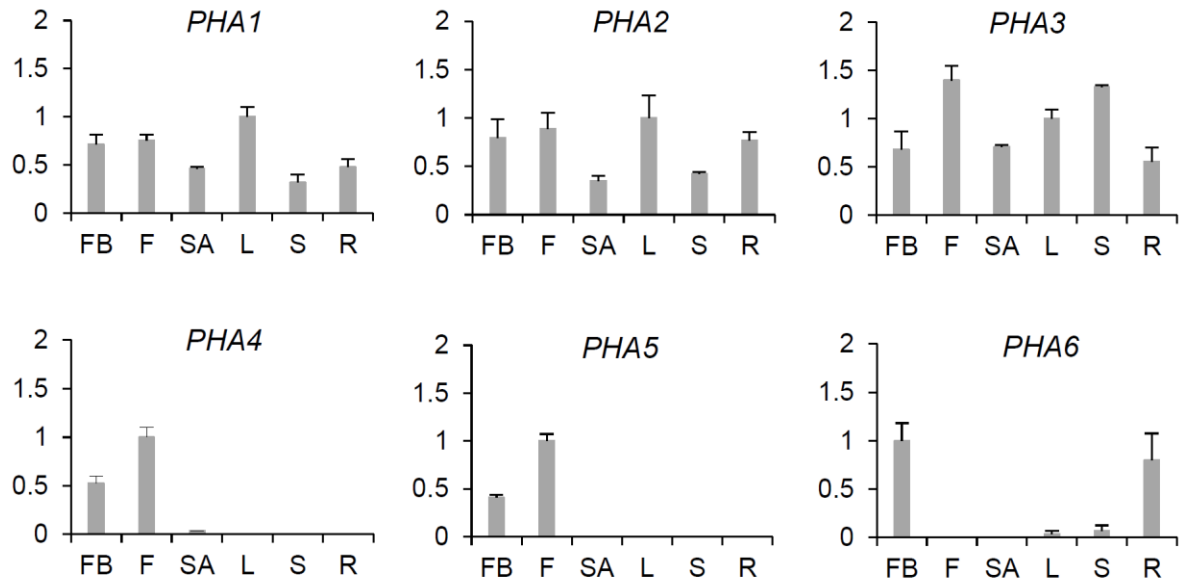

**Fig. S2.** Quantification of RT-PCR bands of Fig. 2A. Quantitative data of RT-PCR bands (mean  $\pm$  SEM) of three independent experiments are displayed in the bar graph (arbitrary units). FB: flower bud, F: flower, SA: shoot apex, L: leaf, S: stem, R: root.

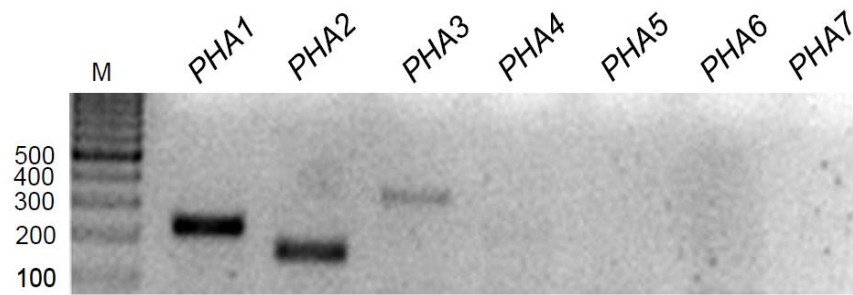

**Fig. S3.** RT-PCR analysis of PHA genes in stolons cultured *in vitro* under tuber-inducing conditions (MS medium plus 8% sucrose) for 15 days. The expected molecular weight of the amplicons are: 206 base pairs (bp) for PHA1, 141 bp for PHA2, 341 bp for PHA3, 372 bp for PHA4, 357 bp for PHA5, 203 bp for PHA6 and 339 bp for PHA7. M: molecular weight marker (numbers indicate the size of the DNA fragments in bp). A representative analysis of three independent experiments is shown.

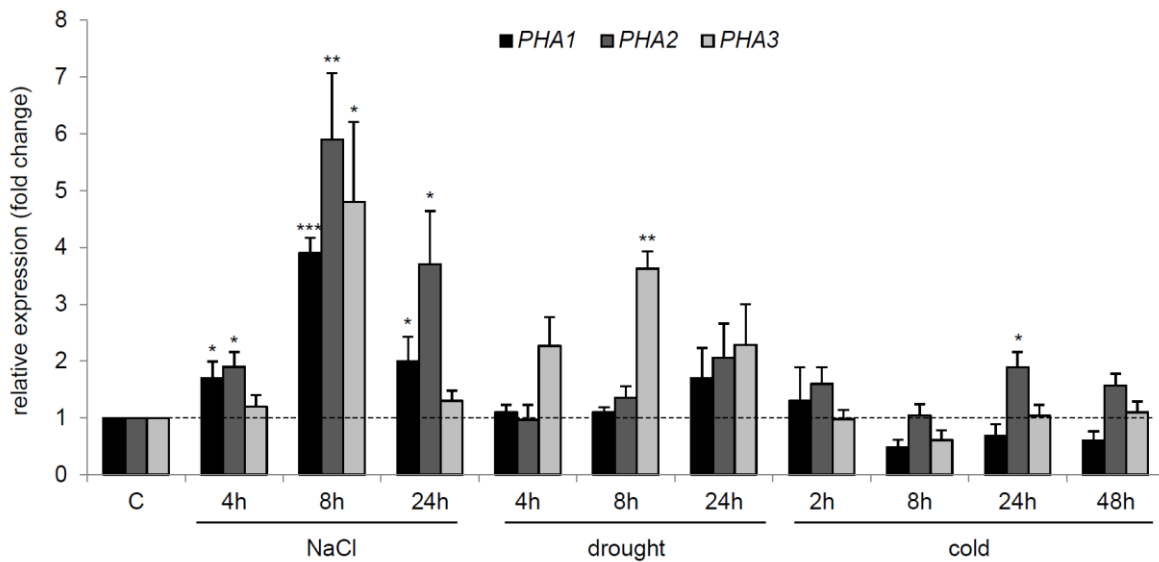

**Fig. S4.** Expression of PHA genes in response to abiotic stress. Detached leaves from soil-grown potato plants were treated with 250 mM NaCl or deprived of water (drought) for the indicated times. *In vitro*-grown potato plants were exposed to 4°C (cold) for the indicated times, while control plants remained at 22°C. Total RNA was isolated from leaves and quantitative PCR was performed to determine the expression of PHA genes. Data are presented as expression level relative to the respective controls (C). Quantitative data (mean ± SEM) of three independent experiments, each consisting of four technical replicates, are displayed in the bar graph. The asterisks indicate statistical significance (\* $p < 0.05$ , \*\* $p < 0.01$ , \*\*\* $p < 0.005$ , with respect to controls).



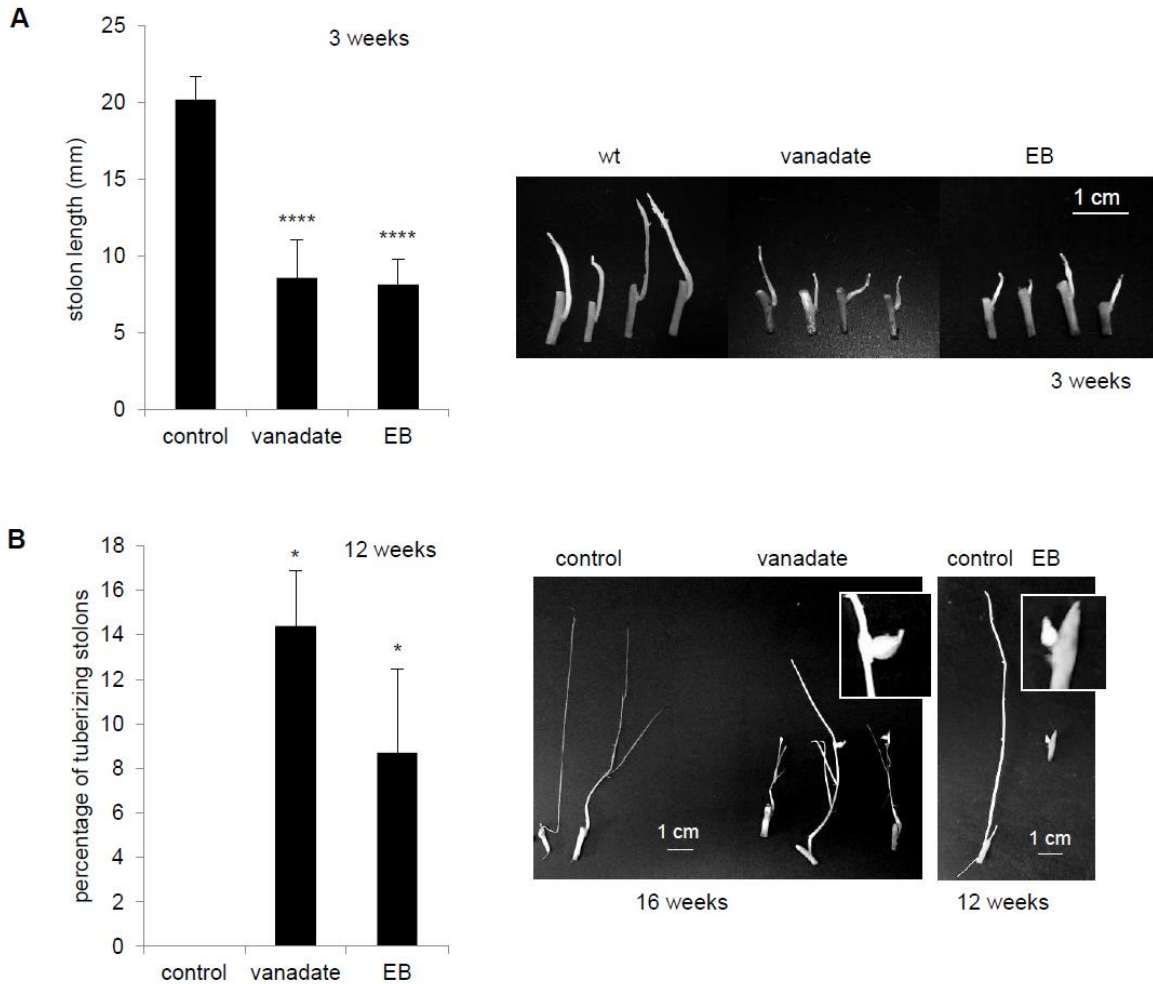

**Fig. S5.** Effect of vanadate and erythrosine B on stolons cultured under non-inducing conditions. Stolons were cultured under non-inducing conditions (MS medium plus 2% sucrose) in the absence (control) or presence of 1 mM vanadate or 50  $\mu$ M erythrosine B (EB). (A) Stolon length, determined after 3 weeks of culture in the absence or presence of inhibitors; a representative image is shown. (B) The percentage of tuberizing stolons was determined after 12 weeks of culture in the absence or presence of inhibitors; a representative image is shown. Quantitative data of three independent experiments (mean  $\pm$  SEM) are displayed in the bar graphs. The asterisks indicate statistical significance (\* $p$ <0.05, \*\*\*\* $p$ <0.001, with respect to control). In these experiments performed under non-inducing conditions, the process was studied for 12-16 weeks, since tuber formation is significantly delayed with respect to tuber-inducing conditions.

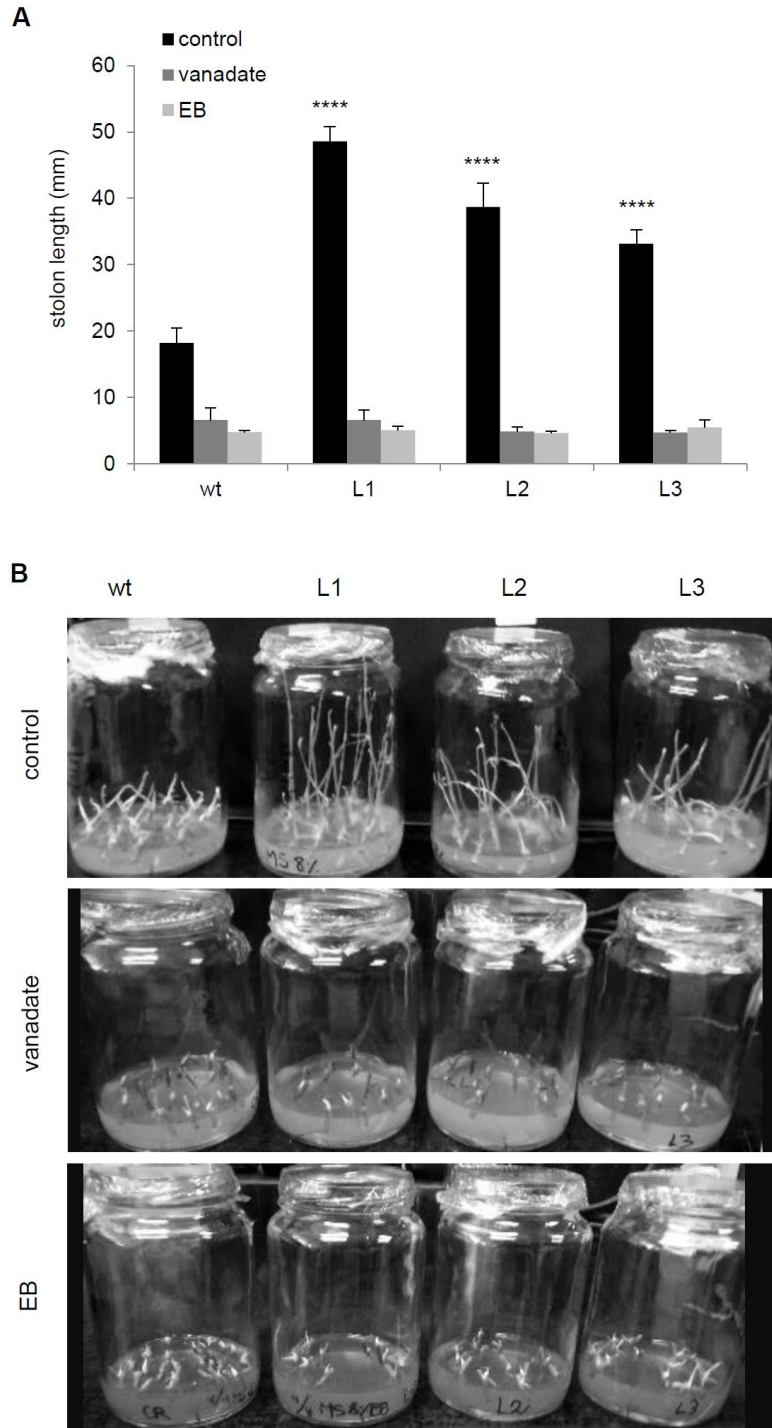

**Fig. S6.** Stolon length of PHA1-OE cultured in the presence of PM H<sup>+</sup>-ATPase inhibitors. Stolons were cultured under tuber-inducing conditions (MS medium plus 8 % sucrose) for two weeks, in the absence or presence of 1 mM vanadate or 50  $\mu$ M erythrosine B (EB). (A) Stolon length; data of three independent experiments (mean  $\pm$  SEM; \*\*\*\* $p$ <0.001, with respect to wt). (B) Representative image of stolons.

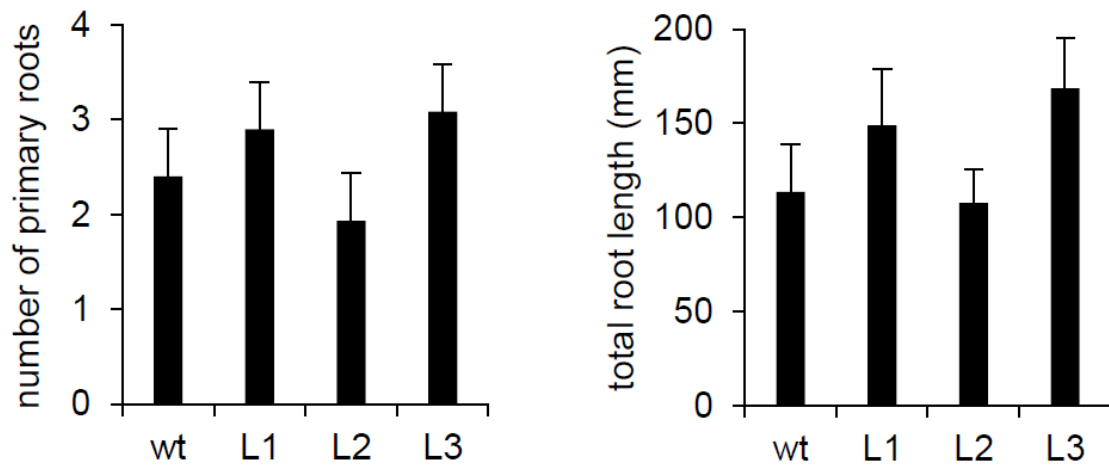

**Fig. S7.** Phenotypic analysis of PHA1-OE plants grown *in vitro*. Wild type (wt) and transgenic (L) plants generated from single-node cuttings were grown on MS medium plus 2% sucrose. After 2 weeks, the number of primary roots and total root length (calculated as the sum of the primary root lengths) were determined. Quantitative data of four independent experiments (mean  $\pm$  SEM) are displayed in the bar graphs. No significant differences were detected between wt and transgenic lines (evaluated by Student's t test).

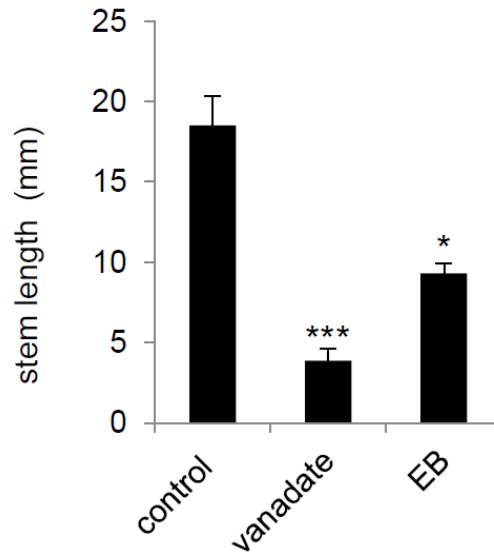

**Fig. S8.** Stem length of wild type plants generated from single-node cuttings, grown on MS medium plus 2 % sucrose in the absence (control) or presence of of 1 mM vanadate or 50  $\mu$ M erythrosine B (EB). Quantitative data of three independent experiments (mean  $\pm$  SEM) are displayed in the bar graph. The asterisks indicate statistical significance (\* $p$ <0.05, \*\*\* $p$ <0.005, with respect to control).

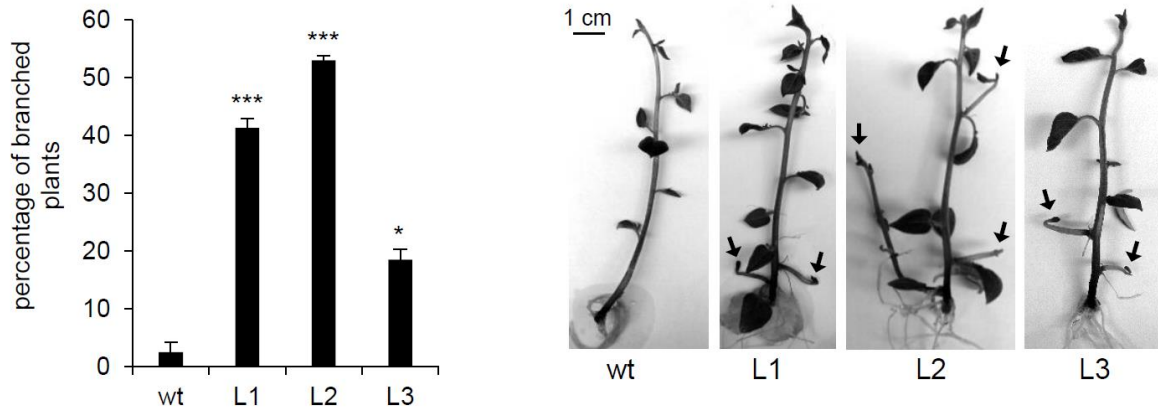

**Fig. S9.** Branching of PHA1-OE plants. Wild type (wt) and transgenic lines (L) generated from shoot apices were grown on MS medium plus 2% sucrose for 3 weeks. The percentage of branched plants was determined as the number of plants presenting at least one branch equal or longer than 5 mm, with respect to the total number of plants (10-15 plants). A representative image of the plants is shown; arrows indicate branches. Quantitative data of three independent experiments (mean  $\pm$  SEM) are displayed in the bar graph. The asterisks indicate statistical significance (\* $p$ <0.05, \*\*\* $p$ <0.005, with respect to wt).
